# Supplementary material
Source: publisher figshare collection journal article supplement (https://acs.figshare.com/ndownloader/files/4356631)

**Supplementary Figure S3:** Denoising of an MS/MS spectrum. Comparison of the raw experimental spectrum (A) and denoised spectrum (B). The major signal peaks remain intact after ~80% of the peaks are removed.

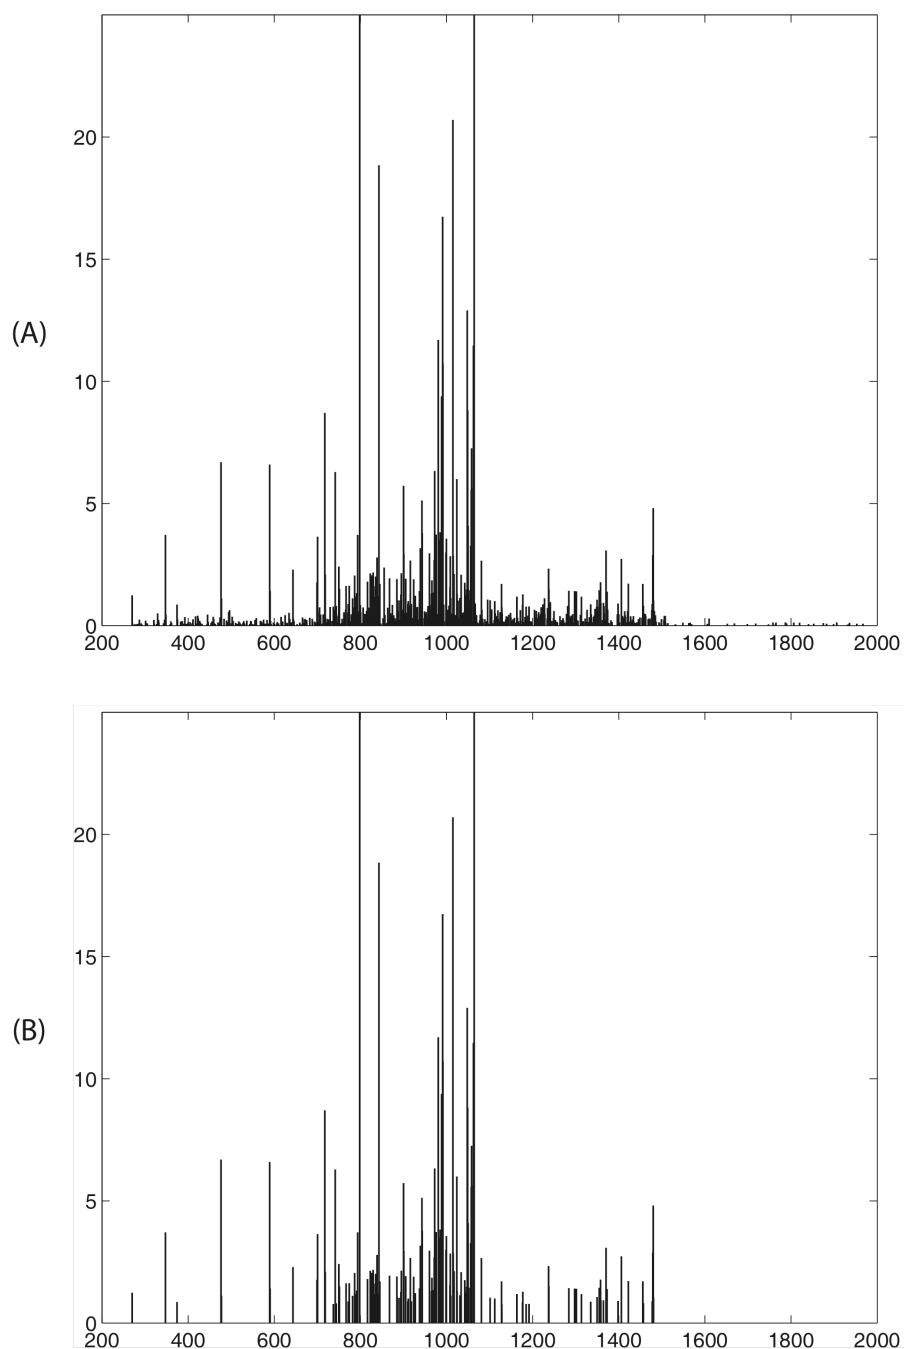

Supplement: Supplementary file 1 [file 4356631]
